# Supplementary material for: Rationale and study design of the MINERVA study: Multicentre Investigation of Novel Electrocardiogram Risk markers in Ventricular Arrhythmia prediction—UK multicentre collaboration
Source: PubMed Central journal article supplement — BMJ Open. 2022 Jan 3;12(1):e059527. doi: 10.1136/bmjopen-2021-059527 (PMC8724816; doi:10.1136/bmjopen-2021-059527), 2022-01-03
Supplement: bmjopen-2021-059527.reviewer_comments.pdf [file bmjopen-2021-059527.reviewer_comments.pdf]

## PEER REVIEW HISTORY

BMJ Open publishes all reviews undertaken for accepted manuscripts. Reviewers are asked to complete a checklist review form (<http://bmjopen.bmj.com/site/about/resources/checklist.pdf>) and are provided with free text boxes to elaborate on their assessment. These free text comments are reproduced below.

This paper was submitted to a another journal from BMJ but declined for publication following peer review. The authors addressed the reviewers' comments and submitted the revised paper to BMJ Open. The paper was subsequently accepted for publication at BMJ Open.

(This paper received three reviews from its previous journal but only two reviewers agreed to published their review.)

## ARTICLE DETAILS

|                            |                                                                                                                                                                                                                                                                                                                     |
|----------------------------|---------------------------------------------------------------------------------------------------------------------------------------------------------------------------------------------------------------------------------------------------------------------------------------------------------------------|
| <b>TITLE (PROVISIONAL)</b> | Rationale and study design of the MINERVA study: Multicentre Investigation of Novel Electrocardiogram Risk markers in Ventricular Arrhythmia prediction – UK multicentre collaboration                                                                                                                              |
| <b>AUTHORS</b>             | Ng, G Andre; Mistry, Amar; Newton, Michelle; Schlindwein, Fernando; Barr, Craig; Bates, Matthew GD; Caldwell, Jane; Das, Moloj; Farooq, Mohsin; Herring, Neil; Lambiase, Pier; Osman, Faizel; Sohal, Manav; Staniforth, Andrew; Tayebjee, Muzahir; Tomlinson, David; Whinnett, Zachary; Yue, Arthur; Nicolson, Will |
