# Supplementary material for: Rationale and study design of the MINERVA study: Multicentre Investigation of Novel Electrocardiogram Risk markers in Ventricular Arrhythmia prediction—UK multicentre collaboration
Source: PubMed Central journal article supplement — BMJ Open. 2022 Jan 3;12(1):e059527. doi: 10.1136/bmjopen-2021-059527 (PMC8724816; doi:10.1136/bmjopen-2021-059527), 2022-01-03
Supplement: bmjopen-2021-059527supp002.pdf [file bmjopen-2021-059527supp002.pdf]

**Appendix 2 – Endpoint Committee**

Chair of Endpoint Committee:

Prof F Leyva (Aston University, Birmingham)

Members of Endpoint Committee:

Dr Shajil Chalil (Blackpool Hospital)

Dr Rachel Myles (University of Glasgow)
